# Supplementary material for: Synthesizing Recent Trends in Interventions and Key Ecosystem Services in Indonesian Peatland
Source: MDPI journal article supplement (doi:10.3390/land13030355), 2024-03-11
Supplement: s1 [file s1]

## Supplementary Material

Table S1. The list of selected articles for systematic review.

| Published year | Title                                                                                                                                                                                                                                                                                                                                                                                                                                                                                                                                                                                                                                                                                                                                                                                                                                                                                                                                                                                                                                  |
|----------------|----------------------------------------------------------------------------------------------------------------------------------------------------------------------------------------------------------------------------------------------------------------------------------------------------------------------------------------------------------------------------------------------------------------------------------------------------------------------------------------------------------------------------------------------------------------------------------------------------------------------------------------------------------------------------------------------------------------------------------------------------------------------------------------------------------------------------------------------------------------------------------------------------------------------------------------------------------------------------------------------------------------------------------------|
| 2001           | Effects of Land-Use Change in Tropical Peat Soil on the Microbial Population and Emission of Greenhouse Gases<br>The carbon content characteristics of tropical peats in Central Kalimantan, Indonesia: Estimating their spatial variability in density<br>A Late Pleistocene and Holocene pollen and charcoal record from peat swamp forest, Lake Sentarum wildlife reserve, West Kalimantan, Indonesia                                                                                                                                                                                                                                                                                                                                                                                                                                                                                                                                                                                                                               |
| 2002           | The amount of carbon released from peat and forest fires in Indonesia during 1997                                                                                                                                                                                                                                                                                                                                                                                                                                                                                                                                                                                                                                                                                                                                                                                                                                                                                                                                                      |
| 2003           | Seasonal changes of CO <sub>2</sub> , CH <sub>4</sub> and N <sub>2</sub> O fluxes in relation to land-use change in tropical peatlands located in coastal area of South Kalimantan                                                                                                                                                                                                                                                                                                                                                                                                                                                                                                                                                                                                                                                                                                                                                                                                                                                     |
| 2004           | A record of Late Pleistocene and Holocene carbon accumulation and climate change from an equatorial peat bog (Kalimantan, Indonesia): Implications for past, present and future carbon dynamics<br>Runaway fires, smoke-haze pollution, and unnatural disasters in Indonesia<br>ENVISAT multisensor data for fire monitoring and impact assessment<br>Environmental change and peatland forest dynamics in the Lake Sentarum area, West Kalimantan, Indonesia<br>Biomarker signature in tropical wetland: Lignin phenol vegetation index (LPVI) and its implications for reconstructing the paleoenvironment                                                                                                                                                                                                                                                                                                                                                                                                                           |
| 2005           | Hydrology of tropical wetland forests: Recent research results from Sarawak peatswamps<br>Carbon fluxes from a tropical peat swamp forest floor<br>Potential health impacts associated with peat smoke: A review<br>Effect of changing groundwater levels caused by land-use changes on greenhouse gas fluxes from tropical peat lands<br>The stratigraphy and fire history of the Kutai Peatlands, Kalimantan, Indonesia<br>Fire, livelihoods, and environmental change in the Middle Mahakam Peatlands, East Kalimantan<br>Controlled burning in peat lands owned by small farmers: A case study in land preparation<br>Fighting future fires with fairness<br>Factors influencing methane emission from peat soils: Comparison of tropical and temperate wetlands<br>Conservation and sustainable use of peat swamp forests by local communities in South East Asia<br>Greenhouse gas emissions from tropical peatlands of Kalimantan, Indonesia<br>Energy balance of a tropical peat swamp forest in Central Kalimantan, Indonesia |

|      |                                                                                                                                                                                                        |
|------|--------------------------------------------------------------------------------------------------------------------------------------------------------------------------------------------------------|
| 2006 | Influences of edaphic factors on the distribution and abundance of a rare palm ( <i>Cyrtostachys renda</i> ) in a peat swamp forest in eastern Sumatra, Indonesia                                      |
|      | Effects of environmental variations on CO <sub>2</sub> efflux from a tropical peatland in eastern sumatra                                                                                              |
|      | Effects of agricultural land-use change and forest fire on N <sub>2</sub> O emission from tropical peatlands, Central Kalimantan, Indonesia                                                            |
|      | Interrelationships between hydrology and ecology in fire degraded tropical peat swamp forests                                                                                                          |
|      | Tropical peatland water management modelling of the air hitam laut catchment in indonesia                                                                                                              |
| 2007 | Shifting cultivation in peatlands                                                                                                                                                                      |
|      | Effect of sulfuric acid discharge on river water chemistry in peat swamp forests in central Kalimantan, Indonesia                                                                                      |
|      | Development of the Indonesian and Malaysian fire danger rating systems                                                                                                                                 |
|      | Microclimate conditions of the developed peatland in Central Kalimantan                                                                                                                                |
|      | Carbon dioxide balance of a tropical peat swamp forest in Kalimantan, Indonesia                                                                                                                        |
| 2008 | Long-time risk of groundwater/drinking water pollution with sulphuric compounds beneath burned peatlands in Indonesia                                                                                  |
|      | Relevance of peat draining rivers in central Sumatra for the riverine input of dissolved organic carbon into the ocean                                                                                 |
|      | Rural livelihoods and burning practices in Savanna landscapes of Nusa Tenggara Timur, Eastern Indonesia                                                                                                |
|      | Determination of the amount of carbon stored in Indonesian peatlands                                                                                                                                   |
|      | Carbon dioxide and methane fluxes in drained tropical peat before and after hydrological restoration                                                                                                   |
| 2009 | Climate regulation of fire emissions and deforestation in equatorial Asia                                                                                                                              |
|      | Peat-water interrelationships in a tropical peatland ecosystem in Southeast Asia                                                                                                                       |
|      | Emergence and behaviors of acid-tolerant <i>Janthinobacterium</i> sp. that evolves N <sub>2</sub> O from deforested tropical peatland                                                                  |
|      | Requirement for particular seed-borne fungi for seed germination and seedling growth of <i>Xyris complanata</i> , a pioneer monocot in topsoil-lost tropical peatland in Central Kalimantan, Indonesia |
|      | Land clearing and the biofuel carbon debt                                                                                                                                                              |
|      | A remote sensing case study of land use/land cover changes in the Peatlands of Muaro Jambi, Indonesia, between 1989-2007                                                                               |
|      | Preparation of activated carbon from peat                                                                                                                                                              |
|      | Derivation of burn scar depths and estimation of carbon emissions with LIDAR in Indonesian peatlands                                                                                                   |
|      | Restoration ecology of lowland tropical peatlands in Southeast Asia: Current knowledge and future research directions                                                                                  |
|      | Controls on the carbon balance of tropical peatlands                                                                                                                                                   |
|      | Biofuel plantations on forested lands: Double jeopardy for biodiversity and climate; [Plantaciones de biocombustible en terrenos boscosos: Doble peligro para la biodiversidad y el clima]             |
|      | Effect of sago palm ( <i>Metroxylon sagu</i> Rottb.) cultivation on the chemical properties of soil and water in tropical peat soil ecosystem                                                          |
|      | Regeneration and restoration of degraded peat swamp forest in Berbak NP, Jambi, Sumatra, Indonesia                                                                                                     |

---

|      |                                                                                                                                                                                                   |
|------|---------------------------------------------------------------------------------------------------------------------------------------------------------------------------------------------------|
|      | The contribution of CHRIS/PROBA data for tropical peat swamp landscape discrimination purposes                                                                                                    |
|      | Methane and CO <sub>2</sub> fluxes from an Indonesian peatland used for sago palm ( <i>Metroxylon sagu</i> Rottb.) cultivation: Effects of fertilizer and groundwater level management            |
|      | View angle effects on the discrimination of some land cover types in a tropical peat swamp forest environment                                                                                     |
|      | Carbon storage in mangrove and peatland ecosystems: A preliminary account from plots in Indonesia                                                                                                 |
| 2010 | Spectral variability and discrimination assessment in a tropical peat swamp landscape using CHRIS/PROBA data                                                                                      |
|      | Planning hydrological restoration of peatlands in Indonesia to mitigate carbon dioxide emissions                                                                                                  |
|      | Detection of fire impact and vegetation recovery over tropical peat swamp forest by satellite data and ground-based NDVI instrument                                                               |
|      | Salkowski's reagent test as a primary screening index for functionalities of rhizobacteria isolated from wild dipterocarp saplings growing naturally on medium-strongly acidic tropical peat soil |
|      | Vegetation correlates of gibbon density in the peat-swamp forest of the Sabangau Catchment, Central Kalimantan, Indonesia                                                                         |
|      | Status of peatland degradation and development in Sumatra and Kalimantan                                                                                                                          |
|      | Peat swamp forest supports high primate densities on Siberut Island, Sumatra, Indonesia                                                                                                           |
|      | Current and future CO <sub>2</sub> emissions from drained peatlands in Southeast Asia                                                                                                             |
|      | Global fire emissions and the contribution of deforestation, savanna, forest, agricultural, and peat fires (1997-2009)                                                                            |
|      | Analysis of peatland development and degradation processes in Jambi, Indonesia                                                                                                                    |
| 2011 | Combining ALOS-PALSAR imagery with field water level measurements for flood mapping of a tropical floodplain                                                                                      |
|      | Hot spots of confusion: Contested policies and competing carbon claims in the peatlands of central Kalimantan, Indonesia                                                                          |
|      | Monitoring the effect of restoration measures in Indonesian peatlands by radar satellite imagery                                                                                                  |
|      | Nitrous oxide emission derived from soil organic matter decomposition from tropical agricultural peat soil in central Kalimantan, Indonesia                                                       |
|      | Greenhouse gas fluxes: Effects of physical conditions                                                                                                                                             |
|      | Deforestation projections for carbon-rich peat swamp forests of Central Kalimantan, Indonesia                                                                                                     |
|      | Carbon emissions: Loophole in forest plan for Indonesia                                                                                                                                           |
|      | Peat swamp forest avifauna of Central Kalimantan, Indonesia: Effects of habitat loss and degradation                                                                                              |
|      | ICESat/GLAS data as a measurement tool for peatland topography and peat swamp forest biomass in Kalimantan, Indonesia                                                                             |
|      | Effect of repeated fires on land-cover change on peatland in southern Central Kalimantan, Indonesia, from 1973 to 2005                                                                            |
|      | Global and regional importance of the tropical peatland carbon pool                                                                                                                               |
|      | Development and carbon sequestration of tropical peat domes in south-east Asia: Links to post-glacial sea-level changes and Holocene climate variability                                          |
|      | Assessment of ALOS PALSAR 50 m orthorectified FBD data for regional land cover classification by support vector machines                                                                          |
|      | Dynamics of fire plumes and smoke clouds associated with peat and deforestation fires in Indonesia                                                                                                |

---

---

|      |                                                                                                                                                                                                                                                                                                                                                                                                                                                                                                                                                                                                                                                                                                                                                                                                                                                                                                                                                                                                                                                                                                                                                                                                                                                                                                                                                                                                                                                                                                                                                                                                                                                                                                                                                                                                                                                                                                                                                                                                                                                                                                                                                                                             |
|------|---------------------------------------------------------------------------------------------------------------------------------------------------------------------------------------------------------------------------------------------------------------------------------------------------------------------------------------------------------------------------------------------------------------------------------------------------------------------------------------------------------------------------------------------------------------------------------------------------------------------------------------------------------------------------------------------------------------------------------------------------------------------------------------------------------------------------------------------------------------------------------------------------------------------------------------------------------------------------------------------------------------------------------------------------------------------------------------------------------------------------------------------------------------------------------------------------------------------------------------------------------------------------------------------------------------------------------------------------------------------------------------------------------------------------------------------------------------------------------------------------------------------------------------------------------------------------------------------------------------------------------------------------------------------------------------------------------------------------------------------------------------------------------------------------------------------------------------------------------------------------------------------------------------------------------------------------------------------------------------------------------------------------------------------------------------------------------------------------------------------------------------------------------------------------------------------|
| 2012 | <p>Aboveground biomass estimation of tropical peat swamp forests using SAR and optical data</p> <p>Flood occurrence mapping of the middle Mahakam lowland area using satellite radar</p> <p>Indonesia's REDD+ pact: Saving imperilled forests or business as usual?</p> <p>Peatland degradation and conversion sequences and interrelations in Sumatra</p> <p>Hyperspectral data application for peat forest monitoring in central Kalimantan, Indonesia</p> <p>Diffusion GHG fluxes at tropical peatland drainage canal water surfaces</p> <p>Relationships between ground water level and CO<sub>2</sub> emission tropical peatland in Indonesia</p> <p>REDDcalculator.com: A web-based decision-support tool for implementing Indonesia's forest moratorium</p> <p>A very real and practical contribution? Lessons from the Kalimantan Forests and Climate Partnership</p> <p>Carbon dioxide emissions from an Acacia plantation on peatland in Sumatra, Indonesia</p> <p>Fire, drought and El Niño relationships on Borneo (Southeast Asia) in the pre-MODIS era (1980-2000)</p> <p>Modeling aboveground biomass in tropical forests using multi-frequency SAR data-A comparison of methods</p> <p>Global extinctions of freshwater fishes follow peatland conversion in Sundaland</p> <p>Does Indonesia's REDD+ moratorium on new concessions spare imminently threatened forests?</p> <p>Emission reduction options for peatlands in the Kubu Raya and Pontianak districts, West Kalimantan, Indonesia</p> <p>Committed carbon emissions, deforestation, and community land conversion from oil palm plantation expansion in West Kalimantan, Indonesia</p> <p>Effect Of Groundwater Level on Soil Respiration In Tropical Peat Swamp Forests</p> <p>Effects of disturbances on the carbon balance of tropical peat swamp forests</p> <p>Application of classification algorithms in data mining for hotspots occurrence prediction in Riau province Indonesia</p> <p>A cost-efficient method to assess carbon stocks in tropical peat soil</p> <p>Artificial Bird Perches for the Regeneration of Degraded Tropical Peat Swamp Forest: A Restoration Tool with Limited Potential</p> |
| 2013 | <p>Characteristics of fire-generated gas emission observed during a large peatland fire in 2009 at Kalimantan, Indonesia</p> <p>Induction of biofilm formation in the betaproteobacterium Burkholderia unamae CK43B exposed to exogenous indole and gallic acid</p> <p>Multi-temporal airborne LiDAR-survey and field measurements of tropical peat swamp forest to monitor changes</p> <p>Post-fire vegetation response as a proxy to quantify the magnitude of burn severity in tropical peatland</p> <p>High-resolution global maps of 21st-century forest cover change</p> <p>Assessment of biomass open burning emissions in Indonesia and potential climate forcing impact</p> <p>Trees are major conduits for methane egress from tropical forested wetlands</p> <p>Application of hyperspectral data for estimating leaf water potential and peatland ground-water level in Indonesia.</p> <p>Oil palm plantations and transboundary haze: Patronage networks and land licensing in Indonesia's peatlands</p>                                                                                                                                                                                                                                                                                                                                                                                                                                                                                                                                                                                                                                                                                                                                                                                                                                                                                                                                                                                                                                                                                                                                                                       |

---

---

2014

Quantifying dynamics in tropical peat swamp forest biomass with multi-temporal LiDAR datasets  
Characterizing forest degradation using multiple sar approaches: Case study of tropical peatland forests in sumatera, Indonesia  
Subsidence estimation of the peatland forest in the central Kalimantan using the PALSAR time series differential interferometry  
Peatland conversion and degradation processes in insular southeast asia: A case study in Jambi, Indonesia  
Threatened predator on the equator: Multi-point abundance estimates of the tiger *Panthera tigris* in central Sumatra  
The effect of ENSO on rainfall characteristics in the tropical peatland areas of Central Kalimantan, Indonesia  
Seed rain into a degraded tropical peatland in Central Kalimantan, Indonesia  
Deep instability of deforested tropical peatlands revealed by fluvial organic carbon fluxes  
Predictive models for hotspots occurrence using decision tree algorithms and logistic regression  
Modelling effects of seasonal variation in water table depth on net ecosystem CO<sub>2</sub> exchange of a tropical peatland  
Spatio-temporal evaluation of carbon emissions from biomass burning in Southeast Asia during the period 2001-2010  
Reform or reversal: the impact of REDD+ readiness on forest governance in Indonesia  
Heterotrophic respiration in drained tropical peat is greatly affected by temperature - A passive ecosystem cooling experiment  
Implementing REDD+ (Reducing Emissions from Deforestation and Degradation): Evidence on governance, evaluation and impacts from the REDD-ALERT project  
Root- and peat-based CO<sub>2</sub> emissions from oil palm plantations  
A high-resolution and multi-year emissions inventory for biomass burning in Southeast Asia during 2001-2010  
Major atmospheric emissions from peat fires in Southeast Asia during non-drought years: Evidence from the 2013 Sumatran fires  
Reducing emissions from land use in Indonesia: Motivation, policy instruments and expected funding streams  
CO<sub>2</sub> emissions from tropical drained peat in Sumatra, Indonesia  
Natural regeneration in a degraded tropical peatland, Central Kalimantan, Indonesia: Implications for forest restoration  
Is CO<sub>2</sub> flux from oil palm plantations on peatland controlled by soil moisture and/or soil and air temperatures?  
Estimation of fuel mass and its loss during a forest fire in peat swamp forests of Central Kalimantan, Indonesia  
The socio-ecological drivers of forest degradation in part of the tropical peatlands of Central Kalimantan, Indonesia  
Carbon storage and release in Indonesian peatlands since the last deglaciation  
A ranking of net national contributions to climate change mitigation through tropical forest conservation  
Community-Based Peatland Management for Greenhouse Gas Reduction Based on Fire-Free Land Preparation  
Carbon dioxide emissions through oxidative peat decomposition on a burnt tropical peatland  
A decision tree based on spatial relationships for predicting hotspots in peatlands

---

---

2015

Indonesia's Contested Domains. Deforestation, Rehabilitation and Conservation-with-Development in Central Kalimantan's Tropical Peatlands

Detection and calculation of peatland subsidence in Indonesia by using interferometric synthetic aperture radar

A satellite-based early warning system for peatland fires toward sustainable palm oil in Indonesia

Mud, muddle and models in the knowledge value-chain to action on tropical peatland conservation

The Tropical Peatland Plantation-Carbon Assessment Tool: Estimating CO<sub>2</sub> emissions from tropical peat soils under plantations

Environmental dependence and seasonal variation of diffuse solar radiation in tropical peatland

Canal blocking strategies for hydrological restoration of degraded tropical peatlands in Central Kalimantan, Indonesia

Effect of plant-mediated oxygen supply and drainage on greenhouse gas emission from a tropical peatland in Central Kalimantan, Indonesia

Interactions between a wild Bornean orang-utan and a Philippine slow loris in a peat-swamp forest

Mapping ecosystem services for land use planning, the case of Central Kalimantan

Structure and abundance of "inter-rhizon" invertebrates in an oxbow lake in the peat swamp area of Central Kalimantan, Indonesia

Characteristics of carbonaceous aerosols emitted from peatland fire in Riau, Sumatra, Indonesia

Mechanism of the toxicity induced by natural humic acid on human vascular endothelial cells

Imaging tropical peatlands in Indonesia using ground-penetrating radar (GPR) and electrical resistivity imaging (ERI): implications for carbon stock estimates and peat soil characterization

Estimation model of groundwater table at peatland in Central Kalimantan, Indonesia

Dynamics of the multi-stakeholder forum and its effectiveness in promoting sustainable forest fire management practices in South Sumatra, Indonesia

Carbon accumulation of tropical peatlands over millennia: A modeling approach

Detection and prediction systems of peat-forest fires in central Kalimantan

Tropical peat formation

Tropical peatland ecosystems

Long-wave infrared identification of smoldering peat fires in Indonesia with nighttime Landsat data

Knowing the subterranean: Land grabbing, oil palm, and divergent expertise in Indonesia's peat soil

Post-dispersal seed removal by ground-feeding rodents in tropical peatlands, Central Kalimantan, Indonesia

Indonesia blazes threaten endangered orangutans

Characteristics of carbonaceous aerosols emitted from peatland fire in Riau, Sumatra, Indonesia (2): Identification of organic compounds

The impact of disturbed peatlands on river outgassing in Southeast Asia

---

---

2.5-Dimensional analysis on peatland subsidence and its relation to groundwater table in Jambi, Indonesia

Tropical peat and peatland definition in Indonesia

Spectral mixture analysis (SMA) of Landsat imagery for land cover study of highly degraded peatland in Indonesia

Morphological and molecular identification of *Beauveria bassiana* as entomopathogen agent from central Kalimantan Peatland, Indonesia

Evaluating spatial and temporal variations of aerosol optical depth and biomass burning over southeast asia based on satellite data products

How hydrology determines seasonal and interannual variations in water table depth, surface energy exchange, and water stress in a tropical peatland: Modeling versus measurements

ACRS 2015 - 36th Asian Conference on Remote Sensing: Fostering Resilient Growth in Asia, Proceedings

Discharged sulfuric acid from peatland to river system

The potential for REDD+ in peatland of Central Kalimantan, Indonesia

Evaluation of disturbed peatland/forest CO<sub>2</sub> emissions by atmospheric concentration measurements

The assessment of the impact of oil palm and rubber plantations on the biotic and abiotic properties of tropical peat swamp soil in Indonesia

Evapotranspiration of tropical peat swamp forests

Peat mapping

Annual variations of carbonaceous PM<sub>2.5</sub> in Malaysia: Influence by Indonesian peatland fires

Land use changes and above-ground biomass estimation in peatlands of Riau and West Kalimantan, Indonesia

Fire emissions and regional air quality impacts from fires in oil palm, timber, and logging concessions in Indonesia

Tropical peatland identification using L-Band full polarimetric alos PALSAR: A case study in Central Kalimantan, Indonesia

Groundwater in peatland

Regional air quality impacts of future fire emissions in Sumatra and Kalimantan

Molluscan assemblages under the influence of peat-draining rivers off East Sumatra, Indonesia

Peatland in Kalimantan

Land change analysis from 2000 to 2004 in peatland of Central Kalimantan, Indonesia using GIS and an extended transition matrix

Peatland management for sustainable agriculture

Peat fires: Emissions likely to worsen

Livelihood strategies of transmigrant farmers in peatland of Central Kalimantan

Peatlands and plantations in Sumatra, Indonesia: Complex realities for resource governance, rural development and climate change mitigation

---

---

2016

8000years of vegetation dynamics and environmental changes of a unique inland peat ecosystem of the Jambi Province in Central Sumatra, Indonesia  
Tropical peatland of the world  
Industrial concessions, fires and air pollution in Equatorial Asia  
Ecosystem services from a degraded peatland of Central Kalimantan: Implications for policy, planning, and management  
The Use of Hotspot Spatial Clustering and Multitemporal Satellite Imagery to Facilitate Peat Land Degradation in West Kalimantan, Indonesia (Case Study in Mensiku Miniwatershed of Kapuas River)  
Land use increases the recalcitrance of tropical peat  
Population exposure to hazardous air quality due to the 2015 fires in Equatorial Asia  
Soil degradation in oil palm and rubber plantations under land resource scarcity  
Aerosol properties in central Kalimantan due to Peatland fire  
Measurement of carbon dioxide flux from tropical peatland in Indonesia using the nocturnal temperature-inversion trap method  
Monitoring peat subsidence and carbon emission in Indonesia peatlands using InSAR time series  
Effectiveness of Roundtable on Sustainable Palm Oil (RSPO) for reducing fires on oil palm concessions in Indonesia from 2012 to 2015  
The Impact of Tropical Peat Fire on Termite Assemblage in Sumatra, Indonesia: Reduced Complexity of Community Structure and Survival Strategies  
Biomass burning drives atmospheric nutrient redistribution within forested peatlands in Borneo  
Landscapes in transition: an analysis of sustainable policy initiatives and emerging corporate commitments in the palm oil industry  
Density based clustering of hotspots in peatland with road and river as physical obstacles  
Species Distribution Model using Hyperspectral Data Application in Peatland, Central Kalimantan  
Atmospheric CH<sub>4</sub> and CO<sub>2</sub> enhancements and biomass burning emission ratios derived from satellite observations of the 2015 Indonesian fire plumes  
Doubling of annual ammonia emissions from the peat fires in Indonesia during the 2015 El Niño  
Mars mission a go; Asteroid lander killed  
Peatland in Indonesia  
Preventing fires and haze in Southeast Asia  
Indonesia palm oil production without deforestation and peat conversion by 2050  
Peatland restoration and ecosystem services: An introduction  
Variable carbon losses from recurrent fires in drained tropical peatlands

---



---

2017

How do the heterotrophic and the total soil respiration of an oil palm plantation on peat respond to nitrogen fertilizer application?

Hydrological and economic effects of oil palm cultivation in Indonesian peatlands

Management driven changes in carbon mineralization dynamics of tropical peat

Digital mapping for cost-effective and accurate prediction of the depth and carbon stocks in Indonesian peatlands

Detection and characterization of low temperature peat fires during the 2015 fire catastrophe in Indonesia using a new high-sensitivity fire monitoring satellite sensor (FireBird)

Who Benefits from Ecosystem Services? A Case Study for Central Kalimantan, Indonesia

The impact of Indonesian peatland degradation on downstream marine ecosystems and the global carbon cycle

A key indicator of transboundary particulate matter pollution derived from Indonesian peatland fires in Malaysia

Influence of water depth and soil amelioration on greenhouse gas emissions from peat soil columns

Comparative Analysis of Spatial Decision Tree Algorithms for Burned Area of Peatland in Rokan Hilir Riau

Concentrations, loads and yields of organic carbon from two tropical peat swamp forest streams in Riau province, Sumatra, Indonesia

Ground surface microtopography and vegetation patterns in a tropical peat swamp forest

Low conservation value of converted habitat for avifauna in tropical peatland on Sumatra, Indonesia

Domestication of *Dyera polyphylla* (Miq.) Steenis in peatland agroforestry systems in Jambi, Indonesia

Fire carbon emissions over maritime southeast Asia in 2015 largest since 1997

Peatland restoration and ecosystem services: Nature-based solutions for societal goals

A high-altitude peatland record of environmental changes in the NW Argentine Andes (24 ° S) over the last 2100 years

Mitigating climate change by preventing peatland fire: Conditions for successful REDD+ in Indonesia

Paludiculture: Sustainable productive use of wet and rewetted peatlands

The impact of forest and peatland exploitation towards decreasing biodiversity of fishes in rangau river, riau-Indonesia

Detection and prediction of peatland cover changes using support vector machine and Markov Chain Model

Determination of Optimal Epsilon (Eps) Value on DBSCAN Algorithm to Clustering Data on Peatland Hotspots in Sumatra

Demineralization of the tooth by peat swamp water

Techno-economic analysis of a peatland gasification process for methanol synthesis and power production

Ecosystem services, degradation and restoration of peat swamps in the south east asian tropics

Tropical peatland burn depth and combustion heterogeneity assessed using uav photogrammetry and airborne LiDAR

Comparison of PM10 pattern and PM2.5 carbonaceous fraction from episodic and non episodic period of peat land wildfire

Combining focus group discussions and choice experiments for economic valuation of peatland restoration: A case study in Central Kalimantan, Indonesia

---

---

Quantitative assessment of source contributions to PM2.5 on the west coast of Peninsular Malaysia to determine the burden of Indonesian peatland fire

Magnetic susceptibility and dielectric properties of peat in Central Kalimantan, Indonesia

An appraisal of Indonesia's immense peat carbon stock using national peatland maps: Uncertainties and potential losses from conversion

Polarimetric synthetic aperture radar application for tropical peatlands classification: A case study in Siak River Transect, Riau Province, Indonesia

Competitions: Grand challenges

Spatial indicators for human activities may explain the 2015 fire hotspot distribution in central Kalimantan Indonesia

Intensified water storage loss by biomass burning in Kalimantan: Detection by GRACE

Fire Distribution in Peninsular Malaysia, Sumatra and Borneo in 2015 with Special Emphasis on Peatland Fires

Towards sustainable management of Indonesian tropical peatlands

Smallholder Farmers and the Dynamics of Degradation of Peatland Ecosystems in Central Kalimantan, Indonesia

Forestry, Forest Fires, and Climate Change in Indonesia

Light-Absorbing Brown Carbon Aerosol Constituents from Combustion of Indonesian Peat and Biomass

Investigation of smoldering combustion propagation of dried peat

Throughfall quantity and carbon input beneath canopy gaps of varying size in degraded tropical peatland forest of West Kalimantan, Indonesia

Soil carbon dioxide emissions from a rubber plantation on tropical peat

Mining social media to inform peatland fire and haze disaster management

Community forest management in Indonesia: Avoided deforestation in the context of anthropogenic and climate complexities

Connection between fire activity and land cover/use change in sumatran peatlands 2007-2015

Post-Fire Peat Land Understory Plant in Rimba Panjang, Sumatera, Indonesia

Threats to intact tropical peatlands and opportunities for their conservation

Organic acids exudates and enzyme activities in the rhizosphere based on distance from the trunk of oil palm in Peatland

Environmental dynamics and carbon accumulation rate of a tropical peatland in Central Sumatra, Indonesia

Precipitation-fire linkages in Indonesia (1997-2015)

Dynamics and Effectiveness of the Multistakeholder Forum in Promoting Sustainable Forest Fire Management Practices in South Sumatra, Indonesia

Forest type diversity on carbon stocks: Cases of recent land cover conditions of tropical lowland, swamp, and peatland forests in West Kalimantan, Indonesia

Risks and opportunities from key importers pushing for sustainability: the case of Indonesian palm oil

Singapore's willingness to pay for mitigation of transboundary forest-fire haze from Indonesia

---

---

Keep wetlands wet: the myth of sustainable development of tropical peatlands – implications for policies and management  
Effect of groundwater level fluctuation on soil respiration rate of tropical peatland in Central Kalimantan, Indonesia  
Tree growth rings in tropical peat swamp forests of Kalimantan, Indonesia  
Greenhouse gas emissions intensity of global croplands  
Perceptions across scales of governance and the Indonesian peatland fires  
Greenhouse gas and air pollutant emissions from land and forest fire in Indonesia during 2015 based on satellite data  
Water uptake by fresh Indonesian peat burning particles is limited by water-soluble organic matter  
Blocking, attracting, imposing, and aligning: The utility of ASEAN forest and environmental regime policies for strong member states  
An expert system model for mapping tropical wetlands and peatlands reveals South America as the largest contributor  
Experimental study of the effect of water spray on the spread of smoldering in Indonesian peat fires  
Sequential pattern analysis of hotspots based on peatland characteristics in Sumatra and Kalimantan  
Effect of density on forward and upward smoldering combustion of cellulosic material  
Factors affecting oxidative peat decomposition due to land use in tropical peat swamp forests in Indonesia  
Fire economy and actor network of forest and land fires in Indonesia  
Temperature and burning history affect emissions of greenhouse gases and aerosol particles from tropical peatland fire  
A common-sense approach to tropical peat swamp forest restoration in Southeast Asia  
From carbon sink to carbon source: Extensive peat oxidation in insular Southeast Asia since 1990  
Prospect of Sustainable Peatland Agriculture for Supporting Food Security and Mitigating Green House Gas Emission in Central Kalimantan, Indonesia  
Conventional pollutant and greenhouse gases emission from peatland fire based on peatland maturity at flaming stage  
Redd+ and forest fires: Implications for the legal and policy forest fire management framework in Indonesia  
Promising native tree species for reforestation of degraded tropical peatlands  
Structural elucidation of condensed tannin from the bark waste of *Acacia crassicarpa* plantation wood in Indonesia  
A global enhancement of hydrogen cyanide in the lower stratosphere throughout 2016  
Nutritional ecology of wild Bornean orangutans (*Pongo pygmaeus wurmbii*) in a peat swamp habitat: Effects of age, sex, and season  
Fire activity in Borneo driven by industrial land conversion and drought during El Niño periods, 1982–2010  
Challenging constraints of livelihoods for farmers in the South Sumatra Peatlands, Indonesia  
Low resource use and high yield concept in climate-smart community empowerment  
Overlapping Land Claims Limit the Use of Satellites to Monitor No-Deforestation Commitments and No-Burning Compliance  
Estimating of *gonystylus bancanus* growing stock in Indonesia (Case study: Riau and Central Kalimantan)

---

---

2018

Emission factors of CO<sub>2</sub>, CO and CH<sub>4</sub> from Sumatran peatland fires in 2013 based on shipboard measurements  
The survival strategies of transmigrants in peatland case study: Basarang Jaya Village, Central Kalimantan  
A case study on the economic valuation of peatland restoration in Central Kalimantan, Indonesia  
IOP Conference Series: Earth and Environmental Science  
Ongoing primary forest loss in Brazil, Democratic Republic of the Congo, and Indonesia  
Water table depth fluctuations during ENSO phenomenon on different tropical peat swamp forest land covers in Katingan, Indonesia  
The Transnationalisation of Competing State Projects: Carbon Offsetting and Development in Sumatra's Coastal Peat Swamps  
A review of land-based greenhouse gas flux estimates in Indonesia  
Variation in soil properties regulate greenhouse gas fluxes and globalwarming potential in three land use types on tropical peat  
Fire spot identification based on hotspot sequential pattern and burned area classification  
Temporal Gravity Gradient of South Kalimantan Region  
Visualizing the spatiotemporal trends of thermal characteristics in a peatland plantation forest in Indonesia: Pilot test using unmanned aerial systems (UASs)  
Geogame on the peat: Designing effective gameplay in geogames app for haze mitigation  
Haze in urban areas from peatland fires in Sumatra based on simulation using HYSPLIT  
Water table evaluation post the construction of canal blocks on peatland in West Kalimantan, Indonesia  
Ecosystem-scale methane flux in tropical peat swamp forest in Indonesia  
Carbon emissions from South-East Asian peatlands will increase despite emission-reduction schemes  
Detection of Dry-Flammable Peatland Area by Using Backscattering Coefficient Information of ALOS-2 Data L-Band Frequency  
Sundaland Peat Carbon Dynamics and Its Contribution to the Holocene Atmospheric CO<sub>2</sub> Concentration  
Deforested and drained tropical peatland sites show poorer peat substrate quality and lower microbial biomass and activity than unmanaged swamp forest  
Constraining the Emission of Particulate Matter From Indonesian Peatland Burning Using Continuous Observation Data  
Determining critical groundwater level to prevent degraded peatland from severe peat fire  
Restoration to offset the impacts of developments at a landscape scale reveals opportunities, challenges and tough choices  
Assessment of suitability of tree species for bioenergy production on burned and degraded peatlands in Central Kalimantan, Indonesia  
Carbon Emission from Peat Fire in 2015  
Smoke radiocarbon measurements from Indonesian fires provide evidence for burning of millennia-aged peat  
Multi-Sensors Remote Sensing for Mapping and Monitoring Canals on Tropical Peatland

---

---

Entomopathogenic fungi of soils of freshwater swamps, tidal lowlands, peatlands, and highlands of South Sumatra, Indonesia

Resilience of a peatland in Central Sumatra, Indonesia to past anthropogenic disturbance: Improving conservation and restoration designs using palaeoecology

The Invisible Carbon Footprint as a hidden impact of peatland degradation inducing marine carbonate dissolution in Sumatra, Indonesia

Socioeconomic factors of smallholder farmers' behavior in biomass burning around palm oil plantation in Indonesia

Secondary aerosol formation promotes water uptake by organic-rich wildfire haze particles in equatorial Asia

Climate regulation: Southeast asian peat swamps

Ground-based measurements of column-averaged carbon dioxide molar mixing ratios in a peatland fire-prone area of Central Kalimantan, Indonesia

Carbon emissions from oil palm development on deep peat soil in central kalimantan indonesia

A Review of Techniques for Effective Tropical Peatland Restoration

Identification of Tropical Peatland Using ALOS 2 Palsar

New tropical peatland gas and particulate emissions factors indicate 2015 Indonesian fires released far more particulate matter (but Less Methane) than current inventories imply

Biologically driven DOC release from peatlands during recovery from acidification

Towards zero burning peatland preparation: Incentive scheme and stakeholders role

The Sustainability of an Environmental Policy: A Review of Indonesia Peat Restoration Program

Will CO<sub>2</sub> Emissions from Drained Tropical Peatlands Decline Over Time? Links Between Soil Organic Matter Quality, Nutrients, and C Mineralization Rates

Peat soil quality index and its determinants as influenced by land use changes in kubu Raya district, West Kalimantan, Indonesia

Restoration of peat dome in ex-Mega rice project area in Central Kalimantan

Geosynthetics application in Indonesia - A case histories

Carbon storage potential in degraded forests of Kalimantan, Indonesia

Tropical Peat Moisture Profiles for Early Information of Drought in Indonesia

Forest and land fires in Pelalawan district, Riau, Indonesia: Drivers, pressures, impacts and responses

A deforestation detective rethinks how industry can quell emissions career-q-and-a

Spatial Analysis of the Correlation between Hot Spot Distribution and Land Cover Type in Sumatra, Indonesia

Proceedings - 2018 IEEE Asia-Pacific Conference on Geoscience, Electronics and Remote Sensing Technology: Best Practice for Disaster Mitigation using Geoscience, Electronic, and Remote Sensing, AGERS 2018

Temporal Patterns of Hotspot Sequences for Early Detection of Peatland Fire in Riau Province

---

---

Modeling burned areas in Indonesia: The FLAM approach  
Temporal prediction of carbon monoxide using the Elman Recurrent Neural Network  
An estimate of the financial cost of peatland restoration in Indonesia  
Enzyme activities in relation to total nutrients of K, Ca, Mg, Fe, Cu, and Zn in oil palm rhizosphere of tropical peatland in Riau, Indonesia  
To treat or not to treat? The seedling performance of native tree species for reforestation on degraded tropical peatlands of SE Asia  
Estimation of carbon emission from peatland fires using Landsat-8 OLI imagery in Siak District, Riau Province  
Physico-chemical properties tests of palm oil based foaming agent using water solvent media from Peatland  
Mapping of smallholder oil palm plantation and development of a growth model  
Effects of seasonal rainfall and water table movement on the soil solution composition of tropical peatland  
Soil moisture retrieval by means of adaptive polarimetric two-scale two-component model with fully polarimetric ALOS-2 data  
Chemical characterization of fine particulate matter emitted by peat fires in Central Kalimantan, Indonesia, during the 2015 El Niño  
Drying kinetics of Indonesian Peat  
Effect of oil palm sustainability certification on deforestation and fire in Indonesia  
Low power wireless network for efficient peatland monitoring system  
Wetlands of Berbak National Park (Indonesia)  
Forest and Land Fires in Indonesia: Assessment and Mitigation  
Peatland fire detection using spatio-temporal data mining analysis in Kalimantan, Indonesia  
Hydrophilic and hydrophobic characteristics of dry peat  
Indonesia's forest conversion moratorium assessed with an agent-based model of Land-Use Change and Ecosystem Services (LUCES)  
Edge effects on biomass, growth, and tree diversity of a degraded peatland in west kalimantan, indonesia  
Biodiversity of the sebangau tropical peat swamp forest, Indonesian Borneo  
Are peatland farming systems sustainable? Case study on assessing existing farming systems in the peatland of Central Kalimantan, Indonesia  
Population and vegetation structure of ramin (*Gonystylus bancanus*) in secondary forests of Ketapang District, West Kalimantan, Indonesia  
Peatland fish of Sebangau, Borneo: Diversity, monitoring and conservation  
Open digital mapping as a cost-effective method for mapping peat thickness and assessing the carbon stock of tropical peatlands

---

2019

---

Spatial analysis of soil texture and peat soil by ndsi method at swamp area of Banyuasin District, Indonesia  
Impact of coastal sediment for reclamation of peatlands in Kubu Raya district, Indonesia  
Sembilang National Park: Mangrove Reserves of Indonesia  
Enhancing water levels of degraded, bare, tropical peatland in West Kalimantan, Indonesia: Impacts on CO<sub>2</sub> emission from soil respiration  
Reducing CO<sub>2</sub> emissions and supporting food security in Central Kalimantan, Indonesia, with improved peatland management  
Gardeners of the forest: Effects of seed handling and ingestion by orangutans on germination success of peat forest plants  
Fire-driven biomass and peat carbon losses and post-fire soil CO<sub>2</sub> emission in a West Kalimantan peatland forest  
Genetic diversity of *Dyera polyphylla* (Miq.) Steenis populations used in tropical peatland restoration in Indonesia  
Controlling factor of carbon dioxide flux from tropical peat soil in palm oil at central Kalimantan, Indonesia  
The social and economic impacts of peat Land palm oil plantation in Indonesia  
Fires, Smoke Exposure, and Public Health: An Integrative Framework to Maximize Health Benefits From Peatland Restoration  
Assessing the health impacts of peatland fires: a case study for Central Kalimantan, Indonesia  
Design of carbon dioxide level measures on peat soil with MG 811 sensor  
New estimate of particulate emissions from Indonesian peat fires in 2015  
InSAR time series analysis of L-band data for understanding tropical peatland degradation and restoration  
Policy forum: Institutional architecture and activities to reduce emissions from forests in Indonesia  
Paludiculture: Can it be a trade-off between ecology and economic benefit on peatland restoration?  
The growt test of rubber seed (*Haveabrasiliensi*) resulted from jelutung (*dyera costulata*) grafting approach with organic fertilizer and biological charcoal treatment.  
Chemical speciation of water-soluble ionic components in PM<sub>2.5</sub> derived from peatland fires in Sumatra Island  
Improved Peatlands Potential for Agricultural Purposes to Support Sustainable Development in Bengkalis District, Riau Province, Indonesia  
Soil physicochemical properties in oil palm plantations impacted to peatland fire  
Application of SAR interferometry using ALOS-2 PALSAR-2 data as precise method to identify degraded peatland areas related to forest fire  
Facing the peat CO<sub>2</sub> threat: digital mapping of Indonesian peatlands—a proposed methodology and its application  
Analysis of stomach content of piscivorous fishes caught in danau panggang peatland, South Kalimantan, Indonesia  
Developing better understanding on tropical peat fire occurrences and dynamics  
Carbon dioxide (CO<sub>2</sub>) emissions on highland peatland that has been planted with coffee in Humbang Hasundutan Regency, North Sumatra Province

---

---

Numerical Modeling of Foot Plate Foundation Located on Peat Soil

Application of Polarimetric Decomposition and Interferometric SAR Using ALOS-2 PALSAR-2 Data to Detect Potential of Combustible Peatland Areas

Quantification of Peat Thickness and Stored Carbon at the Landscape Scale in Tropical Peatlands: A Comparison of Airborne Geophysics and an Empirical Topographic Method

Comparative Study of Methods to Estimate Historical Peat Burnt Area in Gaung - Batang Tuaka River of Peat Hydrological Unit (KHG)

Estimation of Metal Emissions from Tropical Peatland Burning in Indonesia by Controlled Laboratory Experiments

Effect of wildfires on tropical peatland vegetation in Meranti Islands district, Riau province, Indonesia

Relationship between fire and forest cover loss in Riau Province, Indonesia between 2001 and 2012

IOP Conference Series: Earth and Environmental Science

Estimation of Peatland Distribution Using Ratio Dual-pol from Sentinel-1A

Spatial model of peatland fire control strategies through peat maturity level approach: Case Study of the Kepulauan Meranti District

The productivity increasing of peatlands on community land by multi-cropping model in Riau Indonesia

Understanding nutrient cycles as a key to sustainable forest plantation on tropical peatland in Indonesia

Providing biodiversity information to support sustainable development of Sugihan wetlands, South Sumatra

Spatial analysis of hotspot data for tracing the source of annual peat fires in South Sumatera, Indonesia

Groundwater level response of the primary forest, ex-peatland fire, and community mix plantation in the Kampar peninsula, Indonesia

Exploration of the importance of physical properties of Indonesian peatlands to assess critical groundwater table depths, associated drought and fire hazard

The many faces of strict liability in Indonesia's wildfire litigation

Indonesia Fire Danger Rating System (Ina-FDRS), a New Algorithm for the Fire Prevention in Indonesia

The interaction of peat and sulphidic material as substratum in wetland: Ash content and electrical conductivity dynamic

Estimation of Dielectric Constant Using A Dual-pol Sentinel-1A in Tropical Peatland

A comparison of satellite remote sensing data fusion methods to map peat swamp forest loss in Sumatra, Indonesia

2nd International Conference on Environmental Resources Management in Global Region, ICERM 2018

Potential of soil moisture retrieval for tropical peatlands in Indonesia using ALOS-2 L-band full-polarimetric SAR data

Improving strategies for sustainability of short-term agricultural utilization on degraded peatlands in Central Kalimantan

Parched peatlands fuel Indonesia's blazes

Development Paludiculture on Tropical Peatland for Productive and Sustainable Ecosystem in Riau

Estimation of Carbon Dioxide Budget from Peatland in Indonesia with Site-Level Validation

---



---

Application of microwave remote sensing polarimetric synthetic aperture radar for the new geological map of peatland distribution, humidity and its sample properties in Regency of Siak, Riau Province, Indonesia

Are national commitments to reducing emissions from forests effective? Lessons from Indonesia

Historical precipitation data in Sumatra and Kalimantan from 1879 to 1900, by using Dutch colonial materials

Land cover changes reduce net primary production in tropical coastal peatlands of West Kalimantan, Indonesia

Beyond fires and deforestation: Tackling land subsidence in peatland areas, A case study from Riau, Indonesia

The response of soil respiration to climatic drivers in undrained forest and drained oil palm plantations in an Indonesian peatland

Some insight into direct observation of hydrological parameters in peatland area of the south Sumatra

Hidden challenges for conservation and development along the Trans-Papuan economic corridor

Unrelenting games: Multiple negotiations and landscape transformations in the tropical peatlands of Central Kalimantan, Indonesia

MAKING PEACE with OIL PALM Some scientists are helping make palm plantations greener. Others say that doing so legitimizes a destructive industry

Estimating public financing gap to reduce greenhouse gas emissions in Indonesia: A case for forestry sector

Impacts of peat fire on soil flora and fauna, soil properties and environmental damage in riau province, Indonesia

The influence of land-cover changes on the variability of saturated hydraulic conductivity in tropical peatlands

Tropical peatlands under siege: the need for evidence-based policies and strategies

The Impact of Forest Fire on the Biodiversity and the Soil Characteristics of Tropical Peatland

Mixed farming systems on peatlands in Jambi and Central Kalimantan provinces, Indonesia: Should they be described as paludiculture?

Detection and validation of tropical Peatland flaming and smouldering using Landsat-8 SWIR and TIRS bands

Mapping and predicting forest loss in a Sumatran tiger landscape from 2002 to 2050

Drought index for peatland wildfire management in central kalimantan, indonesia during el niño phenomenon

Subsidence and carbon dioxide emissions in a smallholder peatland mosaic in Sumatra, Indonesia

Mitigation of peatland fires and haze disaster through livelihood revitalization: A case study in Pelalawan Riau

Detection of Peat Fire Risk Area Based on Impedance Model and DInSAR Approaches Using ALOS-2 PALSAR-2 Data

Characteristics and causes of forest and land fires in Kapuas district, Central Kalimantan Province, Indonesia

Linking soil respiration and water table depth in tropical peatlands with remotely sensed changes in water storage from the gravity recovery and climate experiment

An exploration of gender equity in household: A case from a Peatland-based community in Riau, Indonesia

Hydrophysical properties of ombrotrophic peat under drained peatlands

Decision tree learning approach to wildfire modeling on peat and non-peat land in riau province

---

---

2020

Application of coastal sediments and foliar seaweed extract and its influence to soil properties, growth and yield of shallot in peatland

Creating a lowland and peatland landscape digital terrain model (DTM) from interpolated partial coverage LiDAR data for Central Kalimantan and East Sumatra, Indonesia

CO<sub>2</sub> fluxes from drained tropical peatland used for oil palm plantation in relation to peat characteristics and crop age after planting

Arugosins O-Q, new fungal metabolites from the fungus xylariaceae sp. isolated from leaves of *lansium domesticum* (Meliaceae)

Evaluating the social and environmental factors behind the 2015 extreme fire event in Sumatra, Indonesia

Ecological aspects and genetic diversity of *Shorea balangeran* in two forest types of Muara Kendawangan Nature Reserve, West Kalimantan, Indonesia

A framework for the development of wetland for agricultural use in Indonesia

AERONET Remotely Sensed Measurements and Retrievals of Biomass Burning Aerosol Optical Properties During the 2015 Indonesian Burning Season

Understanding of fire distribution in the South Sumatra peat area during the last two decades

Spatial logistic regression models for predicting peatland fire in Bengkalis Regency, Indonesia

Carbon stocks, emissions, and aboveground productivity in restored secondary tropical peat swamp forests

Rates and spatial variability of peat subsidence in Acacia plantation and forest landscapes in Sumatra, Indonesia

Optimization of gas pipeline route selection with goal programming considering environmental aspects

Modeling peat- and forestland conversion by oil palm smallholders in Indonesian Borneo

Is Indonesian peatland loss a cautionary tale for Peru? A two-country comparison of the magnitude and causes of tropical peatland degradation

Local knowledge on landscape sustainable-hydrological management reduces soil co<sub>2</sub> emission, fire risk and biomass loss in west Kalimantan Peatland, Indonesia

Morphological Variation of Castor Bean (*Ricinus communis* L.) on Peatland Area in Kepulauan Meranti Riau Indonesia

Towards better use of Indonesian peatlands with paludiculture and low-drainage food crops

Fixing flammable Forest: The scalar politics of peatland governance and restoration in Indonesia

Identification of magnetic mineral forming elements in peatland Alahan Panjang West Sumatra Indonesia, section DD REP B 693 using X-Ray Fluorescence

From canals to the coast: Dissolved organic matter and trace metal composition in rivers draining degraded tropical peatlands in Indonesia

Wading through the swamp: what does tropical peatland restoration mean to national-level stakeholders in Indonesia?

Progress of paludiculture projects in supporting peatland ecosystem restoration in Indonesia

---

---

Application of weather modification technology for peatlands fires mitigation in Riau, Indonesia

Techno-Socio Approaches in Peatland Fire Control in Indonesia

Analysis of tropical peatland fire risk using drought standardized precipitation index method and TRMM rainfall data

Impact of trainings on knowledge, skill, behaviour and income of farmers living around peatlands: Case study in Riau Province

New approach evaluating peatland fires in Indonesian factors

International Conference on Forest Conservation and Management, ICFCM 2019: Innovative Solution for Managing Tropical Forests and Conserving Biodiversity to Support Sustainable Development Goals

A proposal of community-based firefighting in peat hydrological unit of Kahayan - Sebangau River: Methods and approaches

Beyond slash-and-burn: The roles of human activities, altered hydrology and fuels in peat fires in Central Kalimantan, Indonesia

Minimizing carbon loss through integrated water resource management on peatland utilization in Pulau Burung, Riau, Indonesia

The Jurisdictional Approach in Indonesia: Incentives, Actions, and Facilitating Connections

Characteristics of Diurnal Rainfall over Peatland Area of South Sumatra, Indonesia

Tropical peatlands and their conservation are important in the context of COVID-19 and potential future (zoonotic) disease pandemics

The Volumetric Political Forest: Territory, Satellite Fire Mapping, and Indonesia's Burning Peatland

Scanning electron microscope (SEM) imaging and analysis of magnetic minerals of lake Diatas peatland section DD REP B 693

Predicting peatland groundwater table and soil moisture dynamics affected by drainage level

Is flooding considered a threat in the degraded tropical peatlands?

Peatland Policy and Management Strategy to Support Sustainable Development in Indonesia

Temporal prediction model for CO and CO<sub>2</sub> pollutants using long short term memory

Peat Physical and Hydraulic Properties Due to Peatland Fires

The abnormal change of air quality and air pollutants induced by the forest fire in Sumatra and Borneo in 2015

Pumping test for the identification of groundwater potential as water resources in mitigating peatfires

The impact of the European Union (EU) renewable energy directive policy on the management of Indonesian palm oil industry

A new method for rapid measurement of canal water table depth using airborne LiDAR, with application to drained peatlands in Indonesia

Towards biocultural approaches to peatland conservation: The case for fish and livelihoods in Indonesia

The importance of Sugihan wetlands (South Sumatra province) for birds habitat

---

---

Litter productivity and leaf litter nutrient return of three native tree species in drained tropical peatland, Riau-Indonesia  
Towards a study of fire occurrences in Indonesia  
Testate Amoeba Species- and Trait-Based Transfer Functions for Reconstruction of Hydrological Regime in Tropical Peatland of Central Sumatra, Indonesia  
IOP Conference Series: Earth and Environmental Science  
Land cover changes from 1990 to 2019 in Papua, Indonesia: Results of the remote sensing imagery  
Peatland Management Based on Education for Sustainable Development (ESD)  
Preliminary Investigation of Groundwater Resources in the Wetland Area, Dumai  
Short communication: Community of phytoplankton in peatland canal, riau, and wet dune slacks of Parangtritis, Yogyakarta, Indonesia  
Applying the tropical peatland combustion algorithm to landsat-8 operational land imager (OLI) and sentinel-2 multi spectral instrument (MSI) imagery  
Interannual climate variation, land type and village livelihood effects on fires in Kalimantan, Indonesia  
Imaging tropical peatland and aquifer potential in south Sumatra using electrical resistivity tomography  
Profile of dielectric constant of peat in Ogan Komering Ilir Regency, Indonesia using SAR Sentinel-1 and ground penetrating radar  
Isolation and identification of cellulolytic bacteria at fibric, hemic and sapric peat in Teluk Bakung Peatland, Kubu Raya district, Indonesia  
Detection of forest fire used multi sensors system for peatland area in Riau Province  
Soil characteristics and CO<sub>2</sub> emissions of ex-burnt peatland in Kubu Raya District, West Kalimantan, Indonesia  
Relationship between groundwater level and water content in oil palm plantation on drained peatland in Siak, Riau Province, Indonesia  
Near-complete loss of fire-resistant primary tropical forest cover in Sumatra and Kalimantan  
Choices of crops on establishing of agroforestry plot in peatland in Rasau Jaya Dua Village, West Kalimantan, Indonesia  
The institutional fit of peatland governance in Indonesia  
Palm oil expansion in tropical peatland: Distrust between advocacy and service environmental NGOs  
Study on the impact of canal blocking on groundwater fluctuation for tropical peatland restoration  
A review of southeast Asian oil palm and its CO<sub>2</sub> fluxes  
INAFOR EXPO 2019 - International Conference on Translating Science into Climate Policy and Action  
Modeling of groundwater level fluctuation in the tropical peatland area of Riau, Indonesia  
Dynamics of a human-modified tropical peat swamp forest revealed by repeat lidar surveys  
Using a Delphi approach to identify the most efficacious interventions to improve Indonesia's forest and land governance  
Development of agroforestry oil palm for peatland restoration in Jambi Province: Establishing process and initial results

---

---

Evaluation the Effectiveness Implementation of the Weather Modification Technology for Mitigating Peatland Fires  
Historical and cultural constraints of Tebing Tinggi Timur Community in Meranti Riau District in land management for avoiding peat-wild fire  
IOP Conference Series: Earth and Environmental Science  
Canal blocking optimization in restoration of drained peatlands  
Agroforests, Swiddening and Livelihoods between Restored Peat Domes and River: Effects of the 2015 Fire Ban in Central Kalimantan (Indonesia)  
Building an effective coalition to improve forest policy: Lessons from the coastal Tripa peat swamp rainforest, Sumatra, Indonesia  
Clustering Pollutants Concentration from Sumatra Peat Fire using Fuzzy C-Means Algorithm  
Utilization of peatlands based on local wisdom and community welfare in Riau Province, Indonesia  
A spatial decision support system for peatland fires prediction and prevention in Bengkalis Regency, Indonesia  
Soil physicochemical and ethnobiological studies on the peat swamp forests of Southern Papua, Indonesia  
Spatio-temporal pattern analysis of forest fire event in South Kalimantan using integration remote sensing data and GIS for forest fire disaster mitigation  
The effect of water deficit on inflorescence period at palm oil productivity on peatland  
Simple method for mass-trapping of *Chalcosoma atlas* (Coleoptera: Scarabaeidae) in oil palm plantation  
The influence of peat layer above sulphidic material on iron dynamic in wetland  
Human-induced changes in Indonesian peatlands increase drought severity  
Contrasting communications of sustainability science in the media coverage of palm oil agriculture on tropical peatlands in Indonesia, Malaysia and Singapore  
The potential of icesat-2 to identify carbon-rich peatlands in indonesia  
Design alternative on peat soil  
Effects of distance from canal and degradation history on peat bulk density in a degraded tropical peatland  
The resilience of the basarang jaya balinese transmigrants residence in the land of Dayak Ngaju, central Kalimantan  
The potential of liberoid coffee cultivation on the peatlands (a case study: The peatlands in the Meranti island, Riau)  
Tropical peatland forest biomass estimation using polarimetric parameters extracted from RadarSAT-2 images  
Peat hydrological unit needs to be conserved to support food crop production in mendol Island, Riau, Indonesia  
Reconciling oil palm economic development and environmental conservation in Indonesia: A value chain dynamic approach  
Retrieval of tropical peatland forest biomass from polarimetric features in central Kalimantan, Indonesia  
Correlation of drought and fire hotspots by using Standardized Precipitation Index (SPI) from TRMM Rainfall Data from 2015 to 2019 at Central Kalimantan, Indonesia  
Fresh water peatland in the Riau province, Sumatra

---

---

Antimicrobial activity of streptomyces sp. Isolated from acidic peatlands against extended spectrum beta lactamase (ESBL) producing escherichia coli

Acculturation of structure and construction in the houses of balinese migrants (case study: Basarang Jaya Village, Central Kalimantan)

Fire frequency and related land-use and land-cover changes in Indonesia's Peatlands

The response of eggplant (*Solanum Melongena* L.) growth planted on raised-bog peatland towards the provision of chicken dung and Swallow Guano

Strengthening climate change adaptation strategy of fishermen (a case study in Peatland River, Kerumutan Sub District, Riau, Indonesia)

Diversity and utilization of bamboo (*Bambusoideae*) in five islands around Riau Province, Indonesia

The relationship between surface topography and peat thickness on Tebing Tinggi Island, Indonesia

Characterising policy responses to complex socio-ecological problems: 60 fire management interventions in Indonesian peatlands

Green constitution concept to achieve green Indonesia 2030

US biofuel production and policy: Implications for land use changes in Malaysia and Indonesia

Water management for agriculture development in peatlands

Landform affects the distribution of mineral nutrients in the tropical peats: a case study in a peatland of Siak, Indonesia

Assessment of VIIRS 375 m active fire using tropical peatland combustion algorithm applied to Landsat-8 over Indonesia's peatlands

Haze disaster discourses in local Indonesian media: Examining niklas luhmann's perspective on ecological communication

The relationship of some characteristics of peat with oil palm basal stem rot (BSR) caused by *Ganoderma* in peatlands

Trihalomethane and haloacetic acid formation potential of tropical peat water: Effect of tidal and seasonal variations

The destructive impact of burned peatlands to physical and chemical properties of soil

The development of natural rubber composite based canal blocking to sustain peatland environment

Distance to forest, mammal and bird dispersal drive natural regeneration on degraded tropical peatland

Detecting nighttime fire combustion phase by hybrid application of visible and infrared radiation from Suomi NPP VIIRS

Disaster preparedness in coping peatland fires for successful Asian games 2018

Plankton biodiversity in various typologies of inundation in paminggir peatland, south Kalimantan, Indonesia on dry season

Satellite-based estimation of carbon dioxide budget in tropical peatland ecosystems

Peatland subsidence and vegetation cover degradation as impacts of the 2015 El niño event revealed by Sentinel-1A SAR data

Geo-engineering characterization and an approach to estimate the in-situ long-term settlement of a peat deposit at an industrial district

Effects of zero burning waste on the quality of liquid fertilizer and vermicompost

---

---

Mapping acid sulfate soil hydrogeomorphical unit on the peatland landscape using a hybrid remote sensing approach  
Defining ecological restoration of peatlands in Central Kalimantan, Indonesia  
Open digital mapping for accurate assessment of tropical peatlands  
The effect of tropical peat land-use changes on plant diversity and soil properties  
Peatland management for oil palm in Indonesia  
Tropical forest and peatland conservation in Indonesia: Challenges and directions  
Diagnosing spatial biases and uncertainties in global fire emissions inventories: Indonesia as regional case study  
Mapping deep peat carbon stock from a LiDAR based DTM and field measurements, with application to eastern Sumatra  
Sinuous rivers in peat  
Mathematical optimisation model for management of sago palm plantation expansions  
International Workshop on Tropical Wetlands: Innovation in Mapping and Management, 2018  
Community-Based Peat Swamp Restoration Through Agroforestry in Indonesia  
Mapping the actor's belief system in forest fires legislation  
The microbial diversity and structure in peatland forest in Indonesia  
Impact of land-use change on soil carbon dynamics in tropical peatland, West Kalimantan- Indonesia  
Urgent measure of geospatial parameters for flood modeling in Indonesia  
Impact of forest plantation on methane emissions from tropical peatland  
Preventing Peatland Fires in Central Kalimantan, Indonesia: The Role of Economic Incentives and Social Norms  
Analysis of challenges, costs, and governance alternative for peatland restoration in Central Kalimantan, Indonesia  
Restoration of degraded tropical peatland in indonesia: A review  
Identification of highland peat vegetation in the Sub-district of Lintong Nihuta, Humbang Hasundutan Regency, North Sumatera, Indonesia  
Assessment of soil carbon stocks in several peatland covers in Central Kalimantan, Indonesia  
Indicator for peat natural recovery in Sebangau National Park in Central Kalimantan, Indonesia  
Peatland conservation strategies and carbon pricing possibilities for climate change mitigation in Indonesia: A review  
Peatland Community Attitudes towards Conservation and Restoration Programs in Pelalawan, Riau, Indonesia  
Land cover and land use change decreases net ecosystem production in tropical peatlands of West Kalimantan, Indonesia  
Revisiting tropical peatlands in Indonesia: Semi-detailed mapping, extent and depth distribution assessment  
Correlation of publication frequency of newspaper articles with environment and public health issues in fire-prone peatland regions of Riau in Sumatra, Indonesia  
Fish fauna of peatland waters in the middle Mahakam, Kutai Kartanegara, East Kalimantan, Indonesia  
Assessing costs of Indonesian fires and the benefits of restoring peatland  
Forest and land fire smoke detection using GCOM-C data (case study: Pulang Pisau, Central Kalimantan)

---

---

Alternative natural capital-based livelihoods in facing peatland degradation in Rengas Merah hamlet, Ogan Komering Ilir Regency, Indonesia: A financial analysis approach

Tamanu (*Calophyllum inophyllum*) growth performance on different types of degraded peatlands in Central Kalimantan

Village Fund for Peatlands Restoration: Study of Community's Perceived Challenges and Opportunities in Muaro Jambi District

Identifying Key Drivers of Peatland Fires Across Kalimantan's Ex-Mega Rice Project Using Machine Learning

Institutional fragmentation of peat fire management in Indonesia: A knowledge management perspective

Nudging through consensus: ASEAN's role in haze mitigation and environmental governance

Weather radar detection of planetary boundary layer and smoke layer top of peatland fire in Central Kalimantan, Indonesia

Forest Fire in East Nusa Tenggara during 2015-2019: Comparison to Forest Fire in Kalimantan and Sumatera

Refined burned-area mapping protocol using Sentinel-2 data increases estimate of 2019 Indonesian burning

Water table variations on different land use units in a drained tropical peatland island of Indonesia

Impact of climate change on flood inundation in a tropical river basin in Indonesia

Opportunities and challenges for land use-based peatland restoration in Kayu Labu Village, South Sumatra, Indonesia

Reflections on integrated research from community engagement in peatland restoration

Developing sustainable and profitable solutions for peatland restoration

Agriculture land suitability of tidal swampy area at Palingkau Irrigation Area in Central Kalimantan Province for national food estate program

Visualization of agroecological suitability of peatland to pineapple productivity in Kampar District with Fuzzy approach

Simard's Fire Spread Model of Peatland in Kalimantan

Stakeholders' mapping and strategy for restoring peatland forest in west Tanjung Jabung Jambi, Indonesia

Establishing agroforestry conservation buffer zones to protect tropical peatland forests of Indonesia

International Conference on Research Collaboration of Environmental Science

Excessive amount of rainfall decreases oil palm yield on well-drained peatland

Contribution of CO<sub>2</sub> emission from litter decomposition in an oil palm plantation on tropical peatland

Show Windows and Lessons Learned from Peatland Restoration in Indonesia

Management Practice and Restoration of the Peat Swamp Forest in Katingan-Mentaya, Indonesia

A review on sustainability of watershed management in Indonesia

Use of multifrequency (C-band and L-band) SAR data to monitor peat subsidence based on time-series SBAS InSAR technique

Carbon trading system as a climate mitigation scheme: Why Indonesia should adopt it?

The impact of organic pollutants from Indonesian peatland fires on the tropospheric and lower stratospheric composition

Managing water regimes: Controlling greenhouse gas emissions and fires in Indonesian tropical peat swamp forests

---



---

A political-economy model to reduce fire and improve livelihoods in Indonesia's lowlands

The Response of Water Level Depth to Vegetation Composition in Degraded Peatland: A Case Study of Sriwijaya Wetland Botanical Garden, Indonesia

Geographic setting and groundwater table control carbon emission from Indonesian peatland: A meta-analysis

A model of religious moral approach for peatland ecosystem restoration in Indonesia

Problems and urban sustainable development in wetlands based on the thermal conditions

Forest and peatland fire dynamics in South Sumatra Province

Drainage canal impacts on smoke aerosol emissions for Indonesian peatland and non-peatland fires

Dynamic of groundwater table, peat subsidence and carbon emission impacted from deforestation in tropical peatland, Riau, Indonesia

Dynamics of carbon of peat soils under several land uses in Kampar Peninsula, Riau Province, Indonesia

Zeolites and Aggregate-Stabilizing Microbes for Reducing the Degradation and Carbon Emissions in Tropical Peatlands

The politics of forest fires in southeast Asia

PeatFire: An agent-based model to simulate fire ignition and spreading in a tropical peatland ecosystem

Kaleka agroforest in central Kalimantan (Indonesia): Soil quality, hydrological protection of adjacent peatlands, and sustainability

A Novel Low-Cost, High-Resolution Camera System for Measuring Peat Subsidence and Water Table Dynamics

Climate change mitigation on tropical peatlands: A triple burden for smallholder farmers in Indonesia

Mapping Of Peatland Drainage Canals in Indonesia Using Polarization Data of ALOS-2 PALSAR-2

Governing the ungovernable: The politics of disciplining pulpwood and palm oil plantations in Indonesia's tropical peatland

A preliminary study on humic-like substances in particulate matter in Malaysia influenced by Indonesian peatland fires

Geotechnical Characterization of Bengkalis' Peat Using Portable Tools

Spatiotemporal Patterns of Burned Areas Based on the Geographic Information System for Fire Risk Monitoring

Characteristics of organic components in PM2.5 emitted from peatland fires on Sumatra in 2015: Significance of humic-like substances

Carbon balance of tropical peat forests at different fire history and implications for carbon emissions

Steps towards the development of a Peat Fire Danger Rating System in Indonesia

Strategy for realizing regional rural water security on tropical peatland

Climate Change Mitigation Through Forest Fire Prevention and Peatland Rewetting Programs in Central Kalimantan Indonesia

The potential role of coconut in improving the sustainability of agriculture on tropical peatland: A case study of 32 years' practice in Pulau Burung District

Forest Areas with A High Potential Risk of Fire Mapping on Peatlands Using Interferometric Synthetic Aperture Radar

---

---

The role of social capital of Riau women farmer groups in building collective action for tropical peatland restoration  
 The Possibility of COVID-19 Pandemic in Eliminating Burning Activities: A Case Study at Ogan Komering Ilir Regency, South Sumatera  
 Smallholder perceptions of land restoration activities: rewetting tropical peatland oil palm areas in Sumatra, Indonesia  
 Evaluating bundles of interventions to prevent peat-fires in Indonesia  
 Conservation slows down emission increase from a tropical peatland in Indonesia  
 Experts and resource users split over solutions to peatland fires  
 Confidence Analysis of Hotspot as Peat Forest Fire Indicator  
 The effectiveness of breakwaters decreasing the peat shoreline change in Bengkalis Island  
 Tropical Peatland Restoration in Indonesia by Replanting with Useful Indigenous Peat Swamp Species: Paludiculture  
 Hydro-physical properties of agriculturally used peatlands in Liang Anggang Protected Forest, South Kalimantan, Indonesia  
 Evaluating policy coherence: A case study of peatland forests on the Kampar Peninsula landscape, Indonesia  
 Water Balance of Various Peatland Typologies in Central Kalimantan  
 Palm oil cultivation on peatlands and its impact on increasing Indonesia's greenhouse gas emissions  
 Land and forest fire disaster management through the arboretum gambut and community empowerment of Masyarakat peduli api (mpa) csr program pt pertamina (persero) ru ii sungai pakning  
 Haze Pollution Derived from Indonesian Peatland Fires —Chemical Characterization of Particulate Matter  
 The effects of ditch dams on water-level dynamics in tropical peatlands  
 How can we mitigate power imbalances in collaborative environmental governance? Examining the role of the village facilitation team approach observed in west Kalimantan, Indonesia  
 Analysis of peat wetting infrastructure on the peat hydrological units of Bentayan River - Penimpahan River Musi Banyuasin Regency  
 Relation subsidence and water level of peatland cultivated with oil palm in Riau, Indonesia  
 Role of the Roundtable on Sustainable Palm Oil (RSPO) in Tropical Peatland Management  
 Where Policy and Culture Collide: Perceptions and Responses of Swidden Farmers to the Burn Ban in West Kalimantan, Indonesia  
 The early benefits of agroforestry as the solution of social conflict and peat land degradation in Kampar - Riau, Indonesia  
 Community involvement in peatland management: Social intervention approach and environmental law  
 Size-segregated particulate matter down to pm0.1 and carbon content during the rainy and dry seasons in Sumatra island, Indonesia  
 Agroforestry farming system as peatland restoration efforts in Central Kalimantan, Indonesia  
 Agroforestry for restoration of degraded peatlands

---

---

Understory and Soil Macrofauna Diversity under the Three Young Native Species and *Acacia crassicaarpa* in a Drained Peatland of Pelalawan-Riau, Indonesia

The effect of ameliorant on peat soil properties and shallots productivity in peatlands

Soil amelioration using steel slag in drained peatland under oil palm plantation increases CO<sub>2</sub> emission

Identifying and addressing knowledge gaps for improving greenhouse gas emissions estimates from tropical peat forest fires

Did the 2019 Fire Events in South Sumatra Occur Predominantly on Peatlands?

Smart Sensor System for Detection and Forecasting Forest Fire Hotspot in Riau Province Indonesia

The invisible commodity: Local experiences with forest carbon offsetting in Indonesia

Food Estate Program in Central Kalimantan Province as An Integrated and Sustainable Solution for Food Security in Indonesia

Identification of antagonistic bacteria against peanut stem rot disease (*Sclerotium rolfsii* Sacc.) on the peatland of Kuala Pesisir-Nagan Raya, Indonesia

Water balance analysis and hydraulic structure design to prevent peatland fires

Spatio-Temporal Variability of Peat CH<sub>4</sub> and N<sub>2</sub>O Fluxes and Their Contribution to Peat GHG Budgets in Indonesian Forests and Oil Palm Plantations

Lessons learned from Europe's peat management regimes

The use of subsidence to estimate carbon loss from deforested and drained tropical peatlands in Indonesia

Digital mapping and soil carbon stock distribution on various landuse of tropical peatland in Pesisir Selatan, West Sumatra

Evaluation of in vitro activity of *Ganoderma*-antagonistic bacteria from peatland under acidic condition

Late Holocene ENSO-related fire impact on vegetation, nutrient status and carbon accumulation of peatlands in Jambi, Sumatra, Indonesia

Soil CO<sub>2</sub> emissions from a rubber plantation on tropical peat during a strong El Niño year

Dynamics of local governance: The case of peatland restoration in Central Kalimantan, Indonesia

Evaluating accuracy of four MODIS-derived burned area products for tropical peatland and non-peatland fires

Peatland Data Fusion for Forest Fire Susceptibility Prediction Using Machine Learning

Effect of P fertilizer formula to the growth and yield of sweet corn on peatland

Atmospheric methane condition over the South Sumatera peatland during the COVID-19 pandemic

Improving Machine Learning Prediction of Peatlands Fire Occurrence for Unbalanced Data Using SMOTE Approach

Distribution of nickel (Ni) in peatland situated alongside mineral soil derived from ultrabasic rocks

Biomass burning combustion efficiency observed from space using measurements of CO and NO<sub>2</sub> by the TROPospheric Monitoring Instrument (TROPOMI)

Estimating induced land use change emissions for sustainable aviation biofuel pathways

---

---

Spatial model of control of fire prone peatlands based on rainfall data (case study: Kepulauan Meranti Regency, Riau Province)

Lesson learned from the development of sustainable rice farming in peatland

Spatial Analysis of 2019 Peat Fire in South Sumatra Conservation Area

Predicting Forest Fire Using Remote Sensing Data And Machine Learning

The strategic role of civil society organisations in handling climate change: A case of Riau in Indonesia

Chemical and hydro-physical peat characteristics under agricultural peat land management in central Kalimantan, Indonesia

Peatland protection in Indonesia: Toward the right direction?

The Geoelectric Resistivity Methods to Determine the Presence or Position of Layers and the Aquifer Type in Transition and Inland Tropical Peatlands of Central Kalimantan, Indonesia

Monitoring the groundwater level in tropical peatland through UAV mapping of soil surface temperature: a pilot study in Tanjung Leban, Indonesia

The contribution of organic acid on heterotrophic CO<sub>2</sub> flux from tropical peat: A trenching study

Evaluation of different peatland management scenarios to reduce ghg emissions from fires. A case study in tropical peatlands in ogan komering ilir, indonesia; [Évaluation de différents scénarios de gestion des tourbières pour réduire les émissions de GES dues aux incendies. Une étude de cas dans les tourbières tropicales d'Ogan Komering Ilir, en Indonésie]; [Evaluación de diferentes escenarios de gestión de turberas para reducir las emisiones de GEI de los incendios. Un estudio de caso en las turberas tropicales de Ogan Komering Ilir, Indonesia]

Reducing production of co<sub>2</sub> and ch<sub>4</sub> from peaty paddy soils through applying slag in south sumatera, indonesia

Peatland Restoration in Central Kalimantan by Rewetting and Rehabilitation with Shorea balangeran

Integrating ecological, social and policy aspects to develop peatland restoration strategies in Orang Kayo Hitam Forest Park, Jambi, Indonesia

Sago Palm Practice as Natural AeroHydro Culture

Case Study on Community-Based Water Management in Tropical Peatland

Empowerment based peatland ecosystem conservation for fire control and environmental conservation

Local wisdom as a peatland management strategy of land fire mitigation in meranti regency, Indonesia

Real Time System Monitoring and Analysis-Based Internet of Things (IoT) Technology in Measuring Outdoor Air Quality

Innovative financing for peatland restoration in Indonesia

Effectiveness Analysis of Canal Blocking in Sub-peatland Hydrological Unit 5 and 6 Kahayan Sebangau, Central Kalimantan, Indonesia

Spatial Variability in Macro- and Microtextures of A Tropical Intermontane Peatland: Preliminary Investigation into The Kutai Lake Peat System, East Kalimantan, Indonesia

---

---

2022

Changes of tree species diversity in peatland impacted by moderate fire severity at teluk meranti, Pelalawan, Riau province, Indonesia

Hydrological Management Practices

Minimal number of morphoagronomic characters required for the identification of pineapple (*Ananas comosus*) cultivars in peatlands of Riau, Indonesia

The Diversity of Macrofauna in Peatlands that Planted by Palm Oil and Without Palm Oil in Jambi Region, Indonesia

Multinational Corporations and Human Rights in Indonesia: The Need for Improvement in Legislation

Remote Sensing Image Analysis for Identification of Peat Thickness Using Spectral Transformation Approach: Case Study of Bengkalis Island, Riau, Indonesia

Deforestation, plantation-related land cover dynamics and oil palm age-structure change during 1990-2020 in Riau Province, Indonesia

Assessments of Underground Carbon Stocks in Merang-Kepahyang Peatlands, South Sumatra, Indonesia

Assessing resource-based theory in ecotourism management: The case of Sebangau National Park, Indonesia

The effect of indigenous vegetations on the biological control of oil palm basal stem rot (BSR) disease caused by *Ganoderma* in peatlands

Peatland Fire Mitigation: Indigenous People's Way in Surviving Economic and Ecological Sustainability

Improved estimation of fire particulate emissions using a combination of VIIRS and AHI data for Indonesia during 2015–2020

Peatlands Restoration Policies in Indonesia: Success or Failure?

Assessing the impact of forest structure disturbances on the arboreal movement and energetics of orangutans—An agent-based modeling approach

Peatland Loss in Southeast Asia Contributing to U.S. Biofuel's Greenhouse Gas Emissions

Oil palm reconciliation in Indonesia: Balancing rising demand and environmental conservation towards 2050

Community Resilience Related to Community Resources Access to Peatland in Political Ecological Perspectives: A Case Study of Purun (*Eleocharis dulcis*) Craftmen in Ogan Komering Ilir, South Sumatera, Indonesia

Satellite observations and modelling of hydrogen cyanide in the Earth's atmosphere

Natural climate solutions in Indonesia: wetlands are the key to achieve Indonesia's national climate commitment

No evidence for trade-offs between bird diversity, yield and water table depth on oil palm smallholdings: Implications for tropical peatland landscape restoration

Rewetting Tropical Peatlands Reduced Net Greenhouse Gas Emissions in Riau Province, Indonesia

Flooding tolerance of four tropical peatland tree species in a nursery trial

Potential of chitosan/carbon nanoparticles and chitosan/lignocellulose nanofiber composite as growth media for peatland paddy seeds

More data, more problems? Incompatible uncertainty in Indonesia's climate change mitigation projects

---

---

Long-term trajectory and temporal dynamics of tropical peat subsidence in relation to plantation management and climate

Development of Spatial Peatland Fire Danger Index Using Coupled SWAT-MODFLOW Model

Mapping Degraded Area for Tropical Peatland Revegetation Using Forest Canopy Density Model Landsat 8 OLI-TIRS in Central Kalimantan, Indonesia

How can process-based modeling improve peat CO<sub>2</sub> and N<sub>2</sub>O emission factors for oil palm plantations?

Study of Water Balance for Tropical Peatland Restoration Case Study: Sinarwajo Village, Jambi Province, Indonesia

In Vitro Multiplication of *Lophostemon suaveolens* (Sol.ex Gaertn.) Peter G.Wilson & J.T. Waterh); Peatland Tree Species for Rehabilitation

Assessing Sumatran Peat Vulnerability to Fire under Various Condition of ENSO Phases Using Machine Learning Approaches

Chemical Composition, Source Appointment and Health Risk of PM<sub>2.5</sub> and PM<sub>2.5-10</sub> during Forest and Peatland Fires in Riau, Indonesia

Targeted land management strategies could halve peatland fire occurrences in Central Kalimantan, Indonesia

Sea level rise and climate change acting as interactive stressors on development and dynamics of tropical peatlands in coastal Sumatra and South Borneo since the Last Glacial Maximum

Beyond Climatic Variation: Human Disturbances Alter the Effectiveness of a Protected Area to Reduce Fires in a Tropical Peatland

The role of third-party audits in ensuring producer compliance with the Roundtable on Sustainable Palm Oil (RSPO) certification system

Species- and Trait-Based Reconstructions of the Hydrological Regime in a Tropical Peatland (Central Sumatra, Indonesia) during the Holocene Using Testate Amoebae

The Role of El Nino Variability and Peatland in Burnt Area and Emitted Carbon in Forest Fire Modeling

Industry-driven mitigation measures can reduce GHG emissions of palm oil

The Impact of Positive Iod and La Niña on The Dynamics of Hydro-Climatological Parameters on Peatland

Examining the Socio-Economic and Natural Resource Risks of Food Estate Development on Peatlands: A Strategy for Economic Recovery and Natural Resource Sustainability

Knowledge systems approaches for enhancing project impacts in complex settings: community fire management and peatland restoration in Indonesia

The Presence of Trihalomethanes and Haloacetic Acids in Tropical Peat Water

The health impacts of Indonesian peatland fires

3rd International Conference on Geoscience and Earth Resources Engineering

Enabling Factors of NTFP Business Development for Ecosystem Restoration: The Case of Tamanu Oil in Indonesian Degraded Peatland

---

---

Peatlands restorer plant species in the protected forest area

Temporal Subset SBAS InSAR Approach for Tropical Peatland Surface Deformation Monitoring Using Sentinel-1 Data

Tropical peat subsidence rates are related to decadal LULC changes: Insights from InSAR analysis

Spatial patterns and drivers of smallholder oil palm expansion within peat swamp forests of Riau, Indonesia

The Social License to Restore—Perspectives on Community Involvement in Indonesian Peatland Restoration

Evaluation of change in the peat soil properties affected by different fire severities

Differences in Tropical Peat Soil Physical and Chemical Properties Under Different Land Uses: A Systematic Review and Meta-analysis

The partial contribution of CO<sub>2</sub>-emission losses from subsidence in small-holder oil palm plantation on a tropical peatland in West Kalimantan, Indonesia

Study on Good Agriculture Practice (GAP) for Pineapple Cultivation in Labuhan Batu Regency, North Sumatra Province, Indonesia

Assessing the distribution of total Fe, Cu, and Zn in tropical peat at an oil palm plantation and their relationship with several environmental factors

Analysis of Agronomy and Environmental Impacts of Palm Oil Production: Evidence from Indonesia

Mainstreaming sustainable use of suboptimal lands to support food security in Indonesia

Paludiculture: Peatland utilization for food security

Development of agroforestry products in supporting peatland restoration and food security: A lesson from South Sumatra, Indonesia

Productivity of sago palms on smallholder plantations after rewetting in previously drained peatland: a case study on Tebing Tinggi Island, Riau Province, Indonesia

Preliminary study of molecular sieve materials to alleviate problems faced by tropical peatland

Carbon Monoxide (CO) and Particulate Matter (PM<sub>2.5</sub>) Concentration at Central Kalimantan, Indonesia

Food security prospects of rural community in the change and degraded peatland landscape of South Sumatra

Reassessment of peatland fires in Central Kalimantan

Study of oil palm plantation on peatland under spatial policies in Jambi Province, Indonesia

Carbon loss from a deforested and drained tropical peatland over four years as assessed from peat stratigraphy

Market-based commons: Social agroforestry, fire mitigation strategies, and green supply chains in Indonesia's peatlands

Distribution Of Carbon Stocks in Peat Bottom Based on Thickness Class in Pelalawan Village (Riau Province, Indonesia)

Lesson Learned from The 2019 Peatland Fire In Tumbang Nusa Area, Indonesia

Short Communication: Sustainability of ecological dimension in peatland management in The Giam Siak Kecil Bukit Batu Landscape, Riau, Indonesia

Groundwater table and soil-hydrological properties datasets of Indonesian peatlands

---

---

Shifting conflict into collaboration: peatland fires mitigation in the biosphere conservation transition zone in Sumatra, Indonesia

Building knowledge management for better policy and strategy of peatland restoration in Indonesia: Inputs from stakeholders

Comparison of dissolved organic carbon and nutrients content in Papua peatland

Effect of Drainage Channels on Vegetation Diversity of Tropical Peatswamp Forest of Sebangau National Park, Indonesia

The Impact of COVID-19 Lockdown on People's Mobility and Water Quality of Siak River, Indonesia

Spatiotemporal Variations of Soil Moisture and Groundwater Level in A South Sumatra Peatland, Indonesia During 2015–2018

Comparative study of village community participation in peat restoration in the Peat Swamp Forest Management Unit (PSFMU) Tebing Tinggi Island, Indonesia

Tropical Peat Swamp Forests

Land clearing area prioritization using GLAD alert data to prevent peat fires in South Sumatera, Indonesia

Aerosol Index and Machine Learning for Fire Smoke Mapping using The Second-generation Global Imager (SGLI) Data over Tropical Peatland Environments

Carbon emissions reductions from Indonesia's moratorium on forest concessions are cost-effective yet contribute little to Paris pledges

Machine Learning for Mapping Spatial Distribution of Thickness and Carbon Stock of Tropical Peatland Based on Remote Sensing Data: A Case Study in Lake Sentarum National Park, Indonesia

ProbFire: A probabilistic fire early warning system for Indonesia

An improved drought-fire assessment for managing fire risks in tropical peatlands

Analysis of the distribution of hotspot and burn area in Muaro Jambi district, Jambi Province

The Chemical Properties of Burnt Peat Soil in Teluk Bakung Village, West Kalimantan

Collaborative governance for forest land use policy implementation and development

Degree of peatland maturity over different types of land use in Kinali, West Sumatra Indonesia

A 3-Year Tropical Peatland Subsidence Time-Series Derived By Sentinel-1: A Case Study of the Kalimantan, Indonesia

Why estimates of the peat burned in fires in Sumatra and Kalimantan are unreliable and why it matters

Farmers' lives and adaptation strategies toward the forest and peatland fires in Indonesia: Evidence from Central and South Kalimantan, Indonesia

Stakeholder mapping for scaling up purun woven agroindustry as an alternative to strengthening livelihoods on peatlands

Litter Decomposition in Wet Rubber and Fruit Agroforests: Below the Threshold for Tropical Peat Formation

Paludiculture: Peatland utilization to support climate change adaptation

Sustainable development of carbon sinks? Lessons from three types of peatland partnerships in Indonesia

---



---

Agroforestry Approaches in the Restoration of Peatland Landscapes in Central Kalimantan, Indonesia  
Mapping of Potential Hazard Areas for Forest and Land Fire based on GIS in Kepulauan Meranti Regency, Riau  
Thermogravimetric and Kinetic Analysis on Peat Combustion Through Coats-Redfern Fitting Model  
Diversity of cellulolytic bacteria from *Macrotermes gilvus* gut isolated from Indralaya peatland region, Indonesia  
Analysis of limiting factors for food agriculture development in peatland areas  
International Seminar on Tropical Peatlands 2021  
Groundwater level fluctuations in peatlands as responses to canal block construction in Sungai Tohor, Tebing Tinggi Island, Indonesia  
Can We Simultaneously Restore Peatlands and Improve Livelihoods? Exploring Community Home Yard Innovations in Utilizing Degraded Peatland  
Study of peat-mangrove ecosystem in East Kalimantan Province  
A study of agroforestry farming for tropical peatland conservation and rehabilitation in Central Kalimantan, Indonesia  
Peat subsidence in a tropical rubber plantation during a strong El Niño year  
Dynamics Topography Monitoring in Peatland Using the Latest Digital Terrain Model  
The Socioeconomic Conditions of Tropical Peat Farmers: A Case Study in Central Kalimantan, Indonesia  
Assessing the severity of forest fire in Sungai Buluh Protected Peat Forest, Jambi  
Analysis of hydrology parameters in a tropical wetland as an early approach to identify a drought risk in a peatland area  
A termite attack on rubber plantation on peat soil: Level of damage and identification of pest species  
Response of four oil palm varieties to low frond desiccation in the main nursery with water stress conditions on peat  
3rd International Symposium of Earth, Energy, Environmental Science, and Sustainable Development  
Assessing characteristics and land suitability of an intercropping between soybeans and juvenile oil palm over peatlands in Riau, Indonesia  
Integrating Governments Bodies in Peatland Environmental Management to Eliminate the Sectoral Egos  
Application of agroforestry business models to tropical peatland restoration  
Using Bayesian multitemporal classification to monitor tropical forest cover changes in Kalimantan, Indonesia  
Modelling the performance of bunds and ditch dams in the hydrological restoration of tropical peatlands  
The air quality of Palangka Raya, Central Kalimantan, Indonesia: The impacts of forest fires on visibility  
Peatland restoration as an affordable nature-based climate solution with fire reduction and conservation co-benefits in Indonesia  
Leaf Litter Decomposition and Nutrient Release of Three Native Tree Species in a Drained Tropical Peatland in Riau, Indonesia  
Understanding the Greenhouse Gas Impact of Deforestation Fires in Indonesia and Brazil in 2019 and 2020

---

---

2023

Characterization of peatland indigenous bacteria and their potential as biological control agents of *Ganoderma* sp. the causes of oil palm stem rot disease

Agroforestry as Rehabilitation Strategy System in Orang Kayo Hitam Peat Swamp Park Forest, Jambi - Indonesia

International Conference on Science and Technology Applications in Climate Change, STACLIM 2022

Net greenhouse gas balance of fibre wood plantation on peat in Indonesia

Improvement of subgrade on peat soil using laterite soil and cement

Accuracy of tropical peat and non-peat fire forecasts enhanced by simulating hydrology

Recent results from an ecohydrological study of forest species in drained tropical peatlands

Peatland groundwater level in the Indonesian maritime continent as an alert for El Niño and moderate positive Indian Ocean dipole events

Role of actors in promoting sustainable peatland management in Kubu Raya Regency, West Kalimantan, Indonesia

Nitrogen sources affect the growth of local strain *Euglena* sp. isolated from Dieng Peatland, Central Java, Indonesia, and their potential as bio-avtur

Short communication: Macrofungi assemblage in Rawa Bento Forest, Kerinci Seblat National Park, Indonesia

Analysis of Resistance to Fungal Pathogen *Hemileia vastatrix* of Liberica Coffee Based on Functional Marker

Prioritization of peatland restoration and conservation interventions in Sumatra, Kalimantan and Papua

Oil palm (*Elaeis guineensis*) plantation on tropical peatland in South East Asia: Photosynthetic response to soil drainage level for mitigation of soil carbon emissions

Model of community empowerment in utilizing Purun (*Eleocharis dulcis*) resources for sustainable handicrafts in Indonesia's rural peatland communities

Peatland Fire Weather Conditions in Sumatra, Indonesia

Production of dissolving pulp from geronggang (*Cratogeomys arborescens*) wood through prehydrolysis and kraft-SAQ cooking process

Sustainable Peatland Management Model-A Case of Kalamangan Village, Palangka Raya City, Central Kalimantan, Indonesia

Relational and instrumental values of tropical peat landscapes: morality and political ecology in Indonesia

Recent Active Fires in Indonesia's Southern Papua Province Caused by El Niño Conditions

Utilizing information technology towards reducing forest and peatland fire risk in Riau Province, Indonesia

The Analysis of Fire Hotspot Distribution in Kalimantan and Its Relationship with ENSO Phases

Reproductive Performance of Beef Cows in Peatlands of Central Kalimantan, Indonesia

Estimation of Lead and Iron Concentration in Fern (*Stenochlaena palustris* (Burm. F. Bedd)) Grown under Different Conditions of Peatlands

Effect of biomass burning on premature mortality associated with long-term exposure to PM<sub>2.5</sub> in Equatorial Asia

---

---

Water-table responses to storms in forested, drained and ditch-blocked tropical peatlands, Sebangau, Kalimantan, Indonesia

Law enforcement of forest and land fires in Rokan Hilir Regency of Riau Province

Prospects for Governance and Climate Change Resilience in Peatland Management in Indonesia

Peatland fire regime across Riau peat hydrological unit, Indonesia

Deterioration of respiratory health following changes to land cover and climate in Indonesia

A process-based model for quantifying the effects of canal blocking on water table and CO<sub>2</sub> emissions in tropical peatlands

Habitat suitability of a peatland landscape for tiger translocation on Kampar Peninsula, Sumatra, Indonesia

Application Cosmic Lora Ray for the Development of Peatland Forest Fire Prevention System in Indonesia

The Utilization of Arbuscular Mycorrhiza to Support Revegetation on Degraded Tropical Peatland of Central Kalimantan

Floristic Composition Species Diversity of Trees in Peat Swamp Forest in Sanggar Pulau Muda Village, Pelalawan District, Riau, Indonesia

Economic case for sustainable peatland management: A case study in Kahayan-Sebangau Peat Hydrological Unit, Central Kalimantan, Indonesia

Peatland Fire Weather Conditions in Central Kalimantan, Indonesia

Land Swap Option for Sustainable Production of Oil Palm Plantations in Kalimantan, Indonesia

Estimation of Carbon pool in various agricultural crops in peatlands of West and Central Kalimantan, Indonesia

Using machine learning algorithms to predict groundwater levels in Indonesian tropical peatlands

A sudden and widespread change in symptoms and incidence of vascular streak dieback of cocoa (*Theobroma cacao*) linked to environmental change in Sulawesi, Indonesia

Magnetic susceptibility and heavy metal contents in sediments of Riam Kiwa, Riam Kanan and Martapura rivers, Kalimantan Selatan province, Indonesia

Assessing space-based smoldering peatland in the tropics with atmospheric products from multi-sensor satellites

Multi-level actor-network: Case of Peatland programs in a Riau Village, Indonesia (1974–2020)

Soil Hydraulic Conductivity and Soil Water Retention of Inland Peat on Various Land Covers (Case Study: Natural Peat and Burnt Peat)

Peat moisture dataset of Sumatra peatlands

Overcoming Degradation and Increasing the Value of Peatland Benefits Through the Cultivation of Pineapple in Riau Province, Indonesia

Local community representations of tropical peatlands and implications for restoration in Riau, Indonesia

Macrofungal diversity in small-holder oil palm plantations on tropical peatlands

Genome-resolved carbon processing potential of tropical peat microbiomes from an oil palm plantation

The Impact of Rewetting Peatland on Fire Hazard in Riau, Indonesia

---
